# Supplementary material for: Assessing urban and rural neighborhood characteristics using audit and GIS data: derivation and reliability of constructs
Source: PubMed Central journal article supplement (PMC2726116; doi:10.1186/1479-5868-6-44), 2009-07-20
Supplement: 1479-5868-6-44-S1.pdf [file 1479-5868-6-44-S1.pdf]

**[Additional file 1] PIN3 Neighborhood Audit Instrument (Reference: Evenson et al, 2009, IJBNPA)**

| #                           | Item                                                         | Response Options                                                                                                                                                                                                                                                                                                                                                                                                                                                                                    |
|-----------------------------|--------------------------------------------------------------|-----------------------------------------------------------------------------------------------------------------------------------------------------------------------------------------------------------------------------------------------------------------------------------------------------------------------------------------------------------------------------------------------------------------------------------------------------------------------------------------------------|
|                             | Palm ID #                                                    |                                                                                                                                                                                                                                                                                                                                                                                                                                                                                                     |
|                             | Rater ID #s                                                  |                                                                                                                                                                                                                                                                                                                                                                                                                                                                                                     |
|                             | Date                                                         |                                                                                                                                                                                                                                                                                                                                                                                                                                                                                                     |
|                             | Time of day                                                  |                                                                                                                                                                                                                                                                                                                                                                                                                                                                                                     |
|                             | Street segment number                                        |                                                                                                                                                                                                                                                                                                                                                                                                                                                                                                     |
|                             | Street name                                                  |                                                                                                                                                                                                                                                                                                                                                                                                                                                                                                     |
| <b>1</b>                    | Subjective assessment:<br>Is this street walkable            | Relative to other areas you have observed, please provide a subjective assessment.<br><br><input type="checkbox"/> Strongly agree<br><input type="checkbox"/> Agree<br><input type="checkbox"/> Disagree<br><input type="checkbox"/> Strongly disagree                                                                                                                                                                                                                                              |
| <b>RESIDENTIAL LAND USE</b> |                                                              |                                                                                                                                                                                                                                                                                                                                                                                                                                                                                                     |
| <b>2</b>                    | Number of residential units                                  | #<br><b>(if 0, then skip entire section)</b>                                                                                                                                                                                                                                                                                                                                                                                                                                                        |
| <b>3</b>                    | Types of residential housing<br><i>(mark all that apply)</i> | <input type="checkbox"/> Single family - detached<br><input type="checkbox"/> Multi-family/apartment/duplex<br><input type="checkbox"/> Mobile homes/trailer home<br><input type="checkbox"/> Housing authority/HUD projects<br><input type="checkbox"/> New construction / renovation                                                                                                                                                                                                              |
| <b>4</b>                    | Overall condition of most residential units                  | <input type="checkbox"/> Excellent condition<br><input type="checkbox"/> Good condition<br><input type="checkbox"/> Fair condition<br><input type="checkbox"/> Poor/deteriorated condition<br><input type="checkbox"/> Mixed condition<br><i>(extreme differences)</i><br><input type="checkbox"/> Cannot see because heavily wooded <b>(if cannot see, then skip entire section)</b><br><input type="checkbox"/> Cannot see for some other reason <b>(if cannot see, then skip entire section)</b> |
| <b>5</b>                    | Overall condition of resident-kept grounds                   | <input type="checkbox"/> Not applicable - no grounds<br><input type="checkbox"/> Excellent condition<br><input type="checkbox"/> Good condition<br><input type="checkbox"/> Fair condition<br><input type="checkbox"/> Poor/deteriorated condition<br><input type="checkbox"/> Mixed condition<br><i>(extreme differences)</i>                                                                                                                                                                      |
| <b>6</b>                    | Type of most front yards                                     | <input type="checkbox"/> None<br><input type="checkbox"/> Traditional lawn<br><input type="checkbox"/> Landscaped<br><input type="checkbox"/> Heavily wooded<br><input type="checkbox"/> Mixed conditions<br><i>(extreme differences)</i>                                                                                                                                                                                                                                                           |
| <b>7</b>                    | Presence of porches                                          | <input type="checkbox"/> None<br><input type="checkbox"/> Less than half<br><input type="checkbox"/> Half or more than half                                                                                                                                                                                                                                                                                                                                                                         |
| <b>8</b>                    | Presence of some form of decoration                          | <input type="checkbox"/> None<br><input type="checkbox"/> Less than half<br><input type="checkbox"/> Half or more than half                                                                                                                                                                                                                                                                                                                                                                         |
| <b>9</b>                    | Presence of border (fences/shrubs)                           | <input type="checkbox"/> None<br><input type="checkbox"/> Less than half<br><input type="checkbox"/> Half or more than half                                                                                                                                                                                                                                                                                                                                                                         |

|                                                                  |                                                                                                                |                                                                                                                                                                                                                                                                                                                                     |
|------------------------------------------------------------------|----------------------------------------------------------------------------------------------------------------|-------------------------------------------------------------------------------------------------------------------------------------------------------------------------------------------------------------------------------------------------------------------------------------------------------------------------------------|
| <b>10</b>                                                        | Presence of visible security warning signs                                                                     | <input type="checkbox"/> None<br><input type="checkbox"/> Less than half<br><input type="checkbox"/> Half or more than half                                                                                                                                                                                                         |
| <b>11</b>                                                        | Any burned, boarded up, or abandoned residential units                                                         | <input type="checkbox"/> No<br><input type="checkbox"/> Yes                                                                                                                                                                                                                                                                         |
| <b>NONRESIDENTIAL LAND USE</b>                                   |                                                                                                                |                                                                                                                                                                                                                                                                                                                                     |
| <b>12</b>                                                        | Presence of nonresidential commercial (i.e., restaurants, cafes) land use                                      | <input type="checkbox"/> None<br><input type="checkbox"/> Yes, new construction / renovation<br><input type="checkbox"/> Yes, existing<br><input type="checkbox"/> Yes, new construction / renovation and existing                                                                                                                  |
| <b>13</b>                                                        | Presence of nonresidential industrial land use                                                                 | <input type="checkbox"/> None<br><input type="checkbox"/> Yes, new construction / renovation<br><input type="checkbox"/> Yes, existing<br><input type="checkbox"/> Yes, new construction / renovation and existing                                                                                                                  |
| <b>14</b>                                                        | Presence of nonresidential agricultural land                                                                   | <input type="checkbox"/> No<br><input type="checkbox"/> Yes, field or farm                                                                                                                                                                                                                                                          |
| <b>15</b>                                                        | Number of religious structures on segment                                                                      | #                                                                                                                                                                                                                                                                                                                                   |
| <b>16</b>                                                        | Overall condition of most buildings (commercial, industrial, agricultural, or religious)                       | <input type="checkbox"/> Not applicable<br><input type="checkbox"/> Excellent condition<br><input type="checkbox"/> Good condition<br><input type="checkbox"/> Fair condition<br><input type="checkbox"/> Poor/deteriorated condition<br><input type="checkbox"/> Mixed condition<br><i>(extreme differences)</i>                   |
| <b>17</b>                                                        | Any burned, boarded up, or abandoned nonresidential units (commercial, industrial, agricultural, or religious) | <input type="checkbox"/> No<br><input type="checkbox"/> Yes                                                                                                                                                                                                                                                                         |
| <b>18</b>                                                        | Presence of home-based businesses (e.g., repairs, sales, etc)                                                  | <input type="checkbox"/> No<br><input type="checkbox"/> Yes                                                                                                                                                                                                                                                                         |
| <b>PUBLIC, RESIDENTIAL AND NONRESIDENTIAL SPACE / AESTHETICS</b> |                                                                                                                |                                                                                                                                                                                                                                                                                                                                     |
| <b>19</b>                                                        | Presence of land that is vacant / underdeveloped                                                               | <input type="checkbox"/> None <b>(if none, skip to #21)</b><br><input type="checkbox"/> Less than half<br><input type="checkbox"/> Half or more than half                                                                                                                                                                           |
| <b>20</b>                                                        | Overall condition of land that is vacant / underdeveloped                                                      | <input type="checkbox"/> Excellent condition<br><input type="checkbox"/> Good condition<br><input type="checkbox"/> Fair condition<br><input type="checkbox"/> Poor condition (illegal dumping)<br><input type="checkbox"/> Mixed condition<br><i>(extreme differences)</i>                                                         |
| <b>21</b>                                                        | General condition of public spaces                                                                             | <input type="checkbox"/> Excellent condition<br><input type="checkbox"/> Good condition<br><input type="checkbox"/> Fair condition<br><input type="checkbox"/> Poor / deteriorated condition<br><input type="checkbox"/> Mixed conditions<br><i>(extreme differences)</i><br><input type="checkbox"/> Not applicable (private road) |

**[Additional file 1] PIN3 Neighborhood Audit Instrument (Reference: Evenson et al, 2009, IJBNPA)**

|                                        |                                                                                               |                                                                                                                                                                                                                                                                                                                      |
|----------------------------------------|-----------------------------------------------------------------------------------------------|----------------------------------------------------------------------------------------------------------------------------------------------------------------------------------------------------------------------------------------------------------------------------------------------------------------------|
| 22                                     | Visible people                                                                                | <input type="checkbox"/> None ( <b>skip to #24</b> )<br><input type="checkbox"/> Children/youth only<br><input type="checkbox"/> Adults only<br><input type="checkbox"/> Children/youth and adults                                                                                                                   |
| 23                                     | Are the people being physically active                                                        | <input type="checkbox"/> No<br><input type="checkbox"/> Yes, children/youth<br><input type="checkbox"/> Yes, adults<br><input type="checkbox"/> Yes, children/youth and adults                                                                                                                                       |
| 24                                     | Any public or neighborhood park or playground in this segment<br><i>(mark all that apply)</i> | <input type="checkbox"/> No ( <b>skip to #26</b> )<br><input type="checkbox"/> Yes, park<br><input type="checkbox"/> Yes, playground<br><input type="checkbox"/> Yes, church park &/or playground                                                                                                                    |
| 25                                     | Overall condition of park and/or playground                                                   | <input type="checkbox"/> Excellent condition<br><input type="checkbox"/> Good condition<br><input type="checkbox"/> Fair condition<br><input type="checkbox"/> Poor / deteriorated condition<br><input type="checkbox"/> Mixed conditions<br><i>(extreme differences)</i>                                            |
| 26                                     | Visible dogs                                                                                  | <input type="checkbox"/> No<br><input type="checkbox"/> Yes, none are loose and out of yard<br><input type="checkbox"/> Yes, at least one loose and out of yard                                                                                                                                                      |
| 27                                     | Amount of litter                                                                              | <input type="checkbox"/> None ( <b>skip to #29</b> )<br><input type="checkbox"/> A little<br><input type="checkbox"/> A moderate amount<br><input type="checkbox"/> A considerable amount                                                                                                                            |
| 28                                     | Type of litter<br><i>(mark all that apply)</i>                                                | <input type="checkbox"/> Nonalcoholic cans/bottles/paper<br><input type="checkbox"/> Alcoholic cans/bottles<br><input type="checkbox"/> Large items (tires, furniture, appliances, cars)<br><input type="checkbox"/> Other litter                                                                                    |
| 29                                     | Amount of graffiti                                                                            | <input type="checkbox"/> None<br><input type="checkbox"/> A little<br><input type="checkbox"/> A moderate amount<br><input type="checkbox"/> A considerable amount                                                                                                                                                   |
| <b>WALKING AND BICYCLING AMENITIES</b> |                                                                                               |                                                                                                                                                                                                                                                                                                                      |
| 30                                     | Presence of sidewalk                                                                          | <input type="checkbox"/> None ( <b>skip to #33</b> )<br><input type="checkbox"/> One side of street, whole segment<br><input type="checkbox"/> One side of street, partial segment<br><input type="checkbox"/> Both sides of street, whole segment<br><input type="checkbox"/> Both sides of street, partial segment |
| 31                                     | Sidewalk buffer                                                                               | <input type="checkbox"/> Adjacent to street or curb (no buffer)<br><input type="checkbox"/> Within 2 feet of street (buffer)<br><input type="checkbox"/> Between 2-6 feet of street (buffer)<br><input type="checkbox"/> Greater than 6 feet of street (buffer)                                                      |
| 32                                     | Sidewalk condition                                                                            | <input type="checkbox"/> Good (very few bumps/cracks/holes)<br><input type="checkbox"/> Fair (some bumps / cracks / holes)<br><input type="checkbox"/> Poor (many bumps / cracks / holes)<br><input type="checkbox"/> Under repair                                                                                   |
| 33                                     | Presence of footpath along road                                                               | <input type="checkbox"/> None<br><input type="checkbox"/> One side of street, entire length<br><input type="checkbox"/> One side of street, partial length<br><input type="checkbox"/> Both sides of street, entire length<br><input type="checkbox"/> Both sides of street, partial length                          |

|                                         |                                                                                    |                                                                                                                                                                                                                                                                                                                                                                                                                                                                                                                                                                                                                                                                                                                                                                                                                                                                                                                                     |
|-----------------------------------------|------------------------------------------------------------------------------------|-------------------------------------------------------------------------------------------------------------------------------------------------------------------------------------------------------------------------------------------------------------------------------------------------------------------------------------------------------------------------------------------------------------------------------------------------------------------------------------------------------------------------------------------------------------------------------------------------------------------------------------------------------------------------------------------------------------------------------------------------------------------------------------------------------------------------------------------------------------------------------------------------------------------------------------|
| 34                                      | Any trails that you can see in this segment                                        | <input type="checkbox"/> No<br><input type="checkbox"/> Yes, soft surface<br><input type="checkbox"/> Yes, hard surface<br><input type="checkbox"/> Both hard and soft surface                                                                                                                                                                                                                                                                                                                                                                                                                                                                                                                                                                                                                                                                                                                                                      |
| 35                                      | Trees shading walking area                                                         | <input type="checkbox"/> No trees along segment<br><input type="checkbox"/> Yes, some trees along segment<br><input type="checkbox"/> Yes, trees along entire segment                                                                                                                                                                                                                                                                                                                                                                                                                                                                                                                                                                                                                                                                                                                                                               |
| 36                                      | Public lighting                                                                    | <input type="checkbox"/> None<br><input type="checkbox"/> Road oriented<br><input type="checkbox"/> Pedestrian oriented<br><input type="checkbox"/> Both road and pedestrian oriented                                                                                                                                                                                                                                                                                                                                                                                                                                                                                                                                                                                                                                                                                                                                               |
| <b>TRANSIT AND ROAD CHARACTERISTICS</b> |                                                                                    |                                                                                                                                                                                                                                                                                                                                                                                                                                                                                                                                                                                                                                                                                                                                                                                                                                                                                                                                     |
| 37                                      | Transit facilities (mark all that apply)                                           | <input type="checkbox"/> None<br><input type="checkbox"/> Bus stop without bench or shelter<br><input type="checkbox"/> Bus stop with shelter<br><input type="checkbox"/> Bus stop with bench                                                                                                                                                                                                                                                                                                                                                                                                                                                                                                                                                                                                                                                                                                                                       |
| 38                                      | Number of lanes                                                                    | Min number of lanes to cross: _____<br>Max number of lanes to cross: _____                                                                                                                                                                                                                                                                                                                                                                                                                                                                                                                                                                                                                                                                                                                                                                                                                                                          |
| 39                                      | Is road paved                                                                      | <input type="checkbox"/> No<br><input type="checkbox"/> Yes, paved only<br><input type="checkbox"/> Both, paved and gravel                                                                                                                                                                                                                                                                                                                                                                                                                                                                                                                                                                                                                                                                                                                                                                                                          |
| 40                                      | Highest speed limit for segment                                                    | MPH: # _____ (if unknown enter 0)                                                                                                                                                                                                                                                                                                                                                                                                                                                                                                                                                                                                                                                                                                                                                                                                                                                                                                   |
| 41                                      | Presence of a shoulder or bike lane                                                | <input type="checkbox"/> No<br><input type="checkbox"/> Yes, soft surface<br><input type="checkbox"/> Yes, hard surface but not a bike lane<br><input type="checkbox"/> Yes, hard surface bike lane                                                                                                                                                                                                                                                                                                                                                                                                                                                                                                                                                                                                                                                                                                                                 |
| 42                                      | On-street parking                                                                  | <input type="checkbox"/> None or not allowed<br><input type="checkbox"/> Allowed, but restricted<br><input type="checkbox"/> Allowed, no restriction                                                                                                                                                                                                                                                                                                                                                                                                                                                                                                                                                                                                                                                                                                                                                                                |
| 43                                      | Traffic control devices, crossing aids, and signs in segment (mark all that apply) | <input type="checkbox"/> None<br><input type="checkbox"/> Traffic light(s)<br><input type="checkbox"/> Flashing warning sign(s)<br><input type="checkbox"/> Stop sign(s)<br><input type="checkbox"/> Pavement marking / crosswalk(s)<br><input type="checkbox"/> Yield to pedestrian paddles / signal / crossing street sign(s)<br><input type="checkbox"/> "Share the road" bicycle sign<br><input type="checkbox"/> Other pedestrian or bike friendly traffic signs<br><input type="checkbox"/> Bicycle parking facilities<br><input type="checkbox"/> Speed bumps<br><input type="checkbox"/> Median / traffic island<br><input type="checkbox"/> Curb extension(s)<br><input type="checkbox"/> Neighborhood entrance signs<br><input type="checkbox"/> Neighborhood crime watch<br><input type="checkbox"/> No trespassing(s)<br><input type="checkbox"/> Beware of dog / invisible fence<br><input type="checkbox"/> Billboard |

**[Additional file 1] PIN3 Neighborhood Audit Instrument (Reference: Evenson et al, 2009, IJBNPA)**

Acknowledgments:

The audit instrument was developed from:

(1) Caughy M, O'Campo P, and Patterson J. A brief observational measure for urban neighborhoods. Health Place 2001; 7:225-36.

(2) Pikora T, Bull F, Jamrozik K, Knuiman M, Giles-Corti B, Donovan R. Developing a reliable audit instrument to measure the physical environment for physical activity. Am J Prev Med 2002; 23:187-94.

For the development and modification of the instrument, we acknowledge (in alphabetical order): Kelly Evenson, Carrie Fesperman, Brian Frizzelle, Barbara Laraia, Annie Lux, Lynne Messer, and Daniel Rodriguez. The corresponding training materials were developed by (in alphabetical order): Kelly Evenson, Carrie Fesperman, Barbara Laraia, and Lynne Messer.
