# Supplementary material for: Assessing urban and rural neighborhood characteristics using audit and GIS data: derivation and reliability of constructs
Source: PubMed Central journal article supplement (PMC2726116; doi:10.1186/1479-5868-6-44), 2009-07-20
Supplement: 1479-5868-6-44-S2.pdf [file 1479-5868-6-44-S2.pdf]

[Additional File 2] Descriptive statistics for GIS and PIN3 Neighborhood Audit variables for entire sample, overall and by urbanicity (n=10,770)

| Variable*                                                         | Frequency ‡<br>(# segments) |       |         | Weighted percent† |       |         |
|-------------------------------------------------------------------|-----------------------------|-------|---------|-------------------|-------|---------|
|                                                                   | Urban                       | Rural | Overall | Urban             | Rural | Overall |
| Road segments                                                     | 7,660                       | 3,110 | 10,770  | 61.3              | 38.7  | 100.0   |
| <b>GIS Variables</b>                                              |                             |       |         |                   |       |         |
| <b>Cul-de-sac or dead-end road segment</b>                        |                             |       |         |                   |       |         |
| 0 No                                                              | 5,917                       | 2,128 | 8,045   | 81.6              | 73.5  | 78.5    |
| 1 Yes                                                             | 1,743                       | 982   | 2,725   | 18.4              | 26.5  | 21.5    |
| <b>Three or four way intersection</b>                             |                             |       |         |                   |       |         |
| 0 No                                                              | 4,618                       | 2,311 | 6,929   | 56.4              | 74.0  | 63.2    |
| 1 Yes                                                             | 3,042                       | 799   | 3,841   | 43.6              | 26.0  | 36.8    |
| <b>Road segment length &lt; 240m</b>                              |                             |       |         |                   |       |         |
| 0 No                                                              | 1,497                       | 1,121 | 2,618   | 44.6              | 71.0  | 54.8    |
| 1 Yes                                                             | 6,163                       | 1,989 | 8,152   | 55.4              | 29.0  | 45.2    |
| <b>Speed limit</b>                                                |                             |       |         |                   |       |         |
| 0: ≤ 25 MPH                                                       | 5,679                       | 2,180 | 7,859   | 68.7              | 56.7  | 64.0    |
| 1: 26 to ≤ 45 MPH                                                 | 1,535                       | 279   | 1,814   | 21.1              | 7.7   | 15.9    |
| 2: >45 MPH                                                        | 446                         | 651   | 1,097   | 10.2              | 35.6  | 20.0    |
| <b>Half or more of the segment with a steep slope (&gt;5%)</b>    |                             |       |         |                   |       |         |
| 0 No                                                              | 4,317                       | 1,870 | 6,187   | 56.7              | 61.2  | 58.5    |
| 1 Yes                                                             | 3,343                       | 1,240 | 4,583   | 43.3              | 38.8  | 41.5    |
| <b>Residential Land Use<sup>§</sup></b>                           |                             |       |         |                   |       |         |
| <b>1 Walkable street (subjective assessment)</b>                  |                             |       |         |                   |       |         |
| 1 Strongly agree                                                  | 1,275                       | 396   | 1,671   | 15.6              | 8.7   | 12.9    |
| 2 Agree                                                           | 5,154                       | 1,767 | 6,921   | 62.5              | 47.5  | 56.7    |
| 3 Disagree                                                        | 830                         | 585   | 1,415   | 12.4              | 25.2  | 17.3    |
| 4 Strongly disagree                                               | 399                         | 359   | 758     | 9.6               | 18.7  | 13.1    |
| <b>2 Residential units</b>                                        |                             |       |         |                   |       |         |
| 0 No                                                              | 1,449                       | 556   | 2,005   | 18.8              | 15.7  | 17.6    |
| 1 Yes                                                             | 6,211                       | 2,554 | 8,765   | 81.2              | 84.3  | 82.4    |
| <b>3 Types of residential housing</b>                             |                             |       |         |                   |       |         |
| Single family-detached                                            |                             |       |         |                   |       |         |
| 0 No                                                              | 765                         | 365   | 1,130   | 13.3              | 9.5   | 11.8    |
| 1 Yes                                                             | 5,444                       | 2,188 | 7,632   | 86.7              | 90.5  | 88.2    |
| Multi-family/apartment/duplex                                     |                             |       |         |                   |       |         |
| 0 No                                                              | 4,890                       | 2,323 | 7,213   | 76.2              | 91.9  | 82.4    |
| 1 Yes                                                             | 1,319                       | 230   | 1,549   | 23.8              | 9.2   | 17.6    |
| Mobile homes/trailer home                                         |                             |       |         |                   |       |         |
| 0 No                                                              | 6,065                       | 2,066 | 8,131   | 97.4              | 73.3  | 87.9    |
| 1 Yes                                                             | 144                         | 487   | 631     | 2.6               | 26.7  | 12.2    |
| Housing authority/HUD projects                                    |                             |       |         |                   |       |         |
| 0 No                                                              | 6,185                       | 2,546 | 8,731   | 99.6              | 99.8  | 99.7    |
| 1 Yes                                                             | 24                          | 7     | 31      | 0.4               | 0.2   | 0.3     |
| New construction/renovation                                       |                             |       |         |                   |       |         |
| 0 No                                                              | 6,026                       | 2,417 | 8,443   | 96.0              | 93.8  | 95.2    |
| 1 Yes                                                             | 183                         | 136   | 319     | 4.0               | 6.2   | 4.9     |
| <b>4 Overall condition of most residential units<sup>§#</sup></b> |                             |       |         |                   |       |         |
| 0 Excellent condition                                             | 2,219                       | 1,092 | 3,311   | 32.5              | 36.3  | 33.9    |
| 1 Good condition                                                  | 3,328                       | 1,055 | 4,383   | 57.0              | 46.4  | 53.0    |
| 2 Fair, poor/deteriorated, or mixed condition                     | 628                         | 305   | 933     | 10.5              | 17.3  | 13.1    |

[Additional File 2] Descriptive statistics for GIS and PIN3 Neighborhood Audit variables for entire sample, overall and by urbanicity (n=10,770)

| Variable*                                                               | Frequency ‡<br>(# segments) |       |         | Weighted percent‡ |       |         |
|-------------------------------------------------------------------------|-----------------------------|-------|---------|-------------------|-------|---------|
|                                                                         | Urban                       | Rural | Overall | Urban             | Rural | Overall |
| <b>5 Overall condition of residential-kept grounds<sup>s</sup></b>      |                             |       |         |                   |       |         |
| 0 Excellent condition                                                   | 944                         | 392   | 1,336   | 14.0              | 11.7  | 13.1    |
| 1 Good condition                                                        | 3,547                       | 1,394 | 4,941   | 61.7              | 63.7  | 62.5    |
| 2 Fair, poor/deteriorated, or mixed condition                           | 1,303                       | 533   | 1,836   | 24.3              | 24.6  | 24.4    |
| <b>6 Traditional lawn or landscaped?<sup>s</sup></b>                    |                             |       |         |                   |       |         |
| 0 No                                                                    | 422                         | 156   | 578     | 8.1               | 6.9   | 7.6     |
| 1 Yes                                                                   | 5,753                       | 2,295 | 8,048   | 91.9              | 93.1  | 92.4    |
| <b>7 Porches<sup>s</sup></b>                                            |                             |       |         |                   |       |         |
| 0 None                                                                  | 267                         | 123   | 390     | 3.8               | 2.9   | 3.5     |
| 1 Less than half                                                        | 423                         | 147   | 570     | 6.5               | 7.1   | 6.8     |
| 2 Half or more than half                                                | 5,485                       | 2,181 | 7,666   | 89.7              | 90.0  | 89.8    |
| <b>8 Some form of decoration<sup>s</sup></b>                            |                             |       |         |                   |       |         |
| 0 None                                                                  | 331                         | 127   | 458     | 4.9               | 3.8   | 4.5     |
| 1 Less than half                                                        | 638                         | 198   | 836     | 11.2              | 8.7   | 10.3    |
| 2 Half or more than half                                                | 5,205                       | 2,127 | 7,332   | 83.9              | 87.4  | 85.2    |
| <b>9 Border<sup>s</sup></b>                                             |                             |       |         |                   |       |         |
| 0 None                                                                  | 1,504                       | 836   | 2,340   | 22.1              | 25.9  | 23.5    |
| 1 Less than half                                                        | 2,393                       | 998   | 3,391   | 43.5              | 51.0  | 46.3    |
| 2 Half or more than half                                                | 2,278                       | 617   | 2,895   | 34.5              | 23.1  | 30.1    |
| <b>10 Visible security warning signs<sup>s</sup></b>                    |                             |       |         |                   |       |         |
| 0 None                                                                  | 2,259                       | 1,344 | 3,603   | 34.3              | 50.7  | 40.6    |
| 1 Less than half                                                        | 2,746                       | 851   | 3,597   | 50.7              | 42.6  | 47.6    |
| 2 Half or more than half                                                | 1,170                       | 257   | 1,427   | 15.0              | 6.6   | 11.8    |
| <b>11 Any burned/boarded up/abandoned residential units<sup>s</sup></b> |                             |       |         |                   |       |         |
| 0 No                                                                    | 5,994                       | 2,331 | 8,325   | 96.3              | 91.2  | 94.4    |
| 1 Yes                                                                   | 181                         | 121   | 302     | 3.7               | 8.8   | 5.6     |
| <b>Nonresidential Land Use</b>                                          |                             |       |         |                   |       |         |
| <b>12 Commercial land use</b>                                           |                             |       |         |                   |       |         |
| 0 No                                                                    | 6,934                       | 2,872 | 9,806   | 87.3              | 90.7  | 88.7    |
| 1 Yes                                                                   | 726                         | 237   | 963     | 12.7              | 9.3   | 11.3    |
| <b>13 Industrial land use</b>                                           |                             |       |         |                   |       |         |
| 0 No                                                                    | 7,562                       | 3,060 | 10,622  | 98.0              | 97.0  | 97.6    |
| 1 Yes                                                                   | 98                          | 49    | 147     | 2.0               | 3.0   | 2.4     |
| <b>14 Agricultural land</b>                                             |                             |       |         |                   |       |         |
| 0 No                                                                    | 7,628                       | 2,877 | 10,505  | 99.2              | 80.9  | 92.1    |
| 1 Yes                                                                   | 32                          | 232   | 264     | 0.8               | 19.1  | 7.9     |
| <b>15 Religious structures</b>                                          |                             |       |         |                   |       |         |
| 0 No                                                                    | 7,452                       | 3,047 | 10,499  | 96.0              | 97.3  | 96.5    |
| 1 Yes                                                                   | 208                         | 61    | 269     | 4.0               | 2.7   | 3.5     |
| <b>16 Overall condition of most buildings</b>                           |                             |       |         |                   |       |         |
| 0 Not applicable                                                        | 6,743                       | 2,598 | 9,341   | 83.8              | 70.3  | 78.6    |
| 1 Excellent condition                                                   | 253                         | 150   | 403     | 5.1               | 8.0   | 6.2     |
| 2 Good condition                                                        | 539                         | 287   | 826     | 9.2               | 17.3  | 12.3    |
| 3 Fair condition                                                        | 96                          | 51    | 147     | 1.5               | 3.1   | 2.1     |
| 4 Poor/deteriorated condition                                           | 11                          | 10    | 21      | 0.1               | 0.4   | 0.2     |
| 5 Mixed condition                                                       | 15                          | 13    | 28      | 0.3               | 1.0   | 0.6     |
| <b>17 Any burned/boarded up/abandoned nonresidential units</b>          |                             |       |         |                   |       |         |
| 0 No                                                                    | 7,585                       | 3,052 | 10,637  | 98.5              | 97.0  | 97.9    |
| 1 Yes                                                                   | 75                          | 56    | 131     | 1.5               | 3.0   | 2.1     |

[Additional File 2] Descriptive statistics for GIS and PIN3 Neighborhood Audit variables for entire sample, overall and by urbanicity (n=10,770)

| Variable*                                                           | Frequency ‡<br>(# segments) |       |         | Weighted percent‡ |       |         |
|---------------------------------------------------------------------|-----------------------------|-------|---------|-------------------|-------|---------|
|                                                                     | Urban                       | Rural | Overall | Urban             | Rural | Overall |
| <b>18 Home-based businesses</b>                                     |                             |       |         |                   |       |         |
| 0 No                                                                | 7,564                       | 3,051 | 10,615  | 98.3              | 95.9  | 97.3    |
| 1 Yes                                                               | 95                          | 58    | 153     | 1.7               | 4.1   | 2.7     |
| <b>Public, Residential, and Nonresidential Space / Aesthetics</b>   |                             |       |         |                   |       |         |
| <b>19 Vacant/underdeveloped land</b>                                |                             |       |         |                   |       |         |
| 0 No                                                                | 7,387                       | 2,933 | 10,320  | 94.8              | 91.0  | 93.3    |
| 1 Yes                                                               | 273                         | 177   | 450     | 5.2               | 9.0   | 6.7     |
| <b>20 Overall condition of vacant/underdeveloped land</b>           |                             |       |         |                   |       |         |
| 1 Excellent condition                                               | 28                          | 26    | 54      | 13.0              | 9.6   | 11.2    |
| 2 Good condition                                                    | 123                         | 100   | 223     | 42.5              | 63.8  | 53.7    |
| 3 Fair condition                                                    | 108                         | 49    | 157     | 40.9              | 25.8  | 33.0    |
| 4 Poor condition                                                    | 13                          | 2     | 15      | 3.6               | 0.7   | 2.1     |
| 5 Mixed condition                                                   | 0                           | 0     | 0       | 0.0               | 0.0   | 0.0     |
| <b>21 General condition of public spaces &amp;</b>                  |                             |       |         |                   |       |         |
| 0 Excellent condition                                               | 1,749                       | 1,030 | 2,779   | 23.5              | 31.8  | 26.6    |
| 1 Good condition                                                    | 4,911                       | 1,574 | 6,485   | 65.7              | 55.0  | 61.6    |
| 2 Fair, poor/deteriorated, or mixed condition                       | 740                         | 312   | 1,052   | 10.9              | 13.2  | 11.8    |
| <b>22&amp;23 Children/youth visible and physically active</b>       |                             |       |         |                   |       |         |
| 0 No visible children/youth                                         | 7,100                       | 2,952 | 10,052  | 91.5              | 94.3  | 92.6    |
| 1 Visible children/youth but not active                             | 229                         | 69    | 298     | 3.5               | 2.6   | 3.1     |
| 2 Visible children/youth being active                               | 325                         | 85    | 410     | 5.1               | 3.2   | 4.3     |
| <b>22&amp;23 Adults visible and physically active</b>               |                             |       |         |                   |       |         |
| 0 No visible adults                                                 | 5,126                       | 2,359 | 7,485   | 61.8              | 71.7  | 65.6    |
| 1 Visible adults but not active                                     | 1,284                       | 505   | 1,789   | 19.1              | 19.0  | 19.0    |
| 2 Visible adults being active                                       | 1,243                       | 241   | 1,484   | 19.2              | 9.3   | 15.4    |
| <b>24 Any public or neighborhood park or playground<sup>§</sup></b> |                             |       |         |                   |       |         |
| 0 No                                                                | 7,259                       | 2,978 | 10,237  | 90.8              | 95.2  | 92.5    |
| 1 Yes                                                               | 401                         | 130   | 531     | 9.2               | 4.8   | 7.5     |
| <b>25 Overall condition of park and/or playground</b>               |                             |       |         |                   |       |         |
| 1 Excellent condition                                               | 160                         | 70    | 230     | 44.8              | 53.8  | 47.1    |
| 2 Good condition                                                    | 200                         | 43    | 243     | 46.4              | 32.9  | 43.0    |
| 3 Fair condition                                                    | 29                          | 11    | 40      | 5.3               | 8.5   | 6.1     |
| 4 Poor/deteriorated condition                                       | 8                           | 6     | 14      | 2.9               | 4.8   | 3.4     |
| 5 Mixed condition                                                   | 3                           | 0     | 3       | 0.6               | 0.0   | 0.4     |
| <b>26 Visible dogs</b>                                              |                             |       |         |                   |       |         |
| 0 No                                                                | 7,018                       | 2,797 | 9,815   | 90.2              | 85.0  | 88.2    |
| 1 Yes                                                               | 642                         | 312   | 954     | 9.8               | 15.0  | 11.8    |
| <b>27 Amount of litter</b>                                          |                             |       |         |                   |       |         |
| 0 None                                                              | 3,682                       | 1,610 | 5,292   | 40.6              | 36.4  | 38.9    |
| 1 A little                                                          | 3,582                       | 1,329 | 4,911   | 52.2              | 53.6  | 52.7    |
| 2 A moderate or considerable amount                                 | 396                         | 171   | 567     | 7.3               | 10.0  | 8.3     |
| <b>28 Type of litter</b>                                            |                             |       |         |                   |       |         |
| Nonalcoholic cans/bottles/paper                                     |                             |       |         |                   |       |         |
| 0 No                                                                | 96                          | 63    | 159     | 2.4               | 3.6   | 2.8     |
| 1 Yes                                                               | 3,881                       | 1,436 | 5,317   | 97.6              | 96.4  | 97.2    |
| Alcoholic cans/bottles                                              |                             |       |         |                   |       |         |
| 0 No                                                                | 3,361                       | 1,176 | 4,537   | 81.4              | 68.0  | 76.0    |
| 1 Yes                                                               | 616                         | 323   | 939     | 18.6              | 32.0  | 24.0    |

Large items

[Additional File 2] Descriptive statistics for GIS and PIN3 Neighborhood Audit variables for entire sample, overall and by urbanicity (n=10,770)

| Variable*                                                 | Frequency ‡<br>(# segments) |       |         | Weighted percent‡ |       |         |
|-----------------------------------------------------------|-----------------------------|-------|---------|-------------------|-------|---------|
|                                                           | Urban                       | Rural | Overall | Urban             | Rural | Overall |
| 0 No                                                      | 3,755                       | 1,328 | 5,083   | 91.9              | 88.0  | 90.4    |
| 1 Yes                                                     | 222                         | 171   | 393     | 8.1               | 12.0  | 9.6     |
| Other litter                                              |                             |       |         |                   |       |         |
| 0 No                                                      | 3,709                       | 1,335 | 5,044   | 91.4              | 86.9  | 89.6    |
| 1 Yes                                                     | 268                         | 164   | 432     | 8.6               | 13.1  | 10.4    |
| <b>29 Graffiti</b>                                        |                             |       |         |                   |       |         |
| 0 No                                                      | 7,406                       | 3,060 | 10,466  | 96.0              | 98.1  | 96.8    |
| 1 Yes                                                     | 252                         | 50    | 302     | 4.0               | 1.9   | 3.2     |
| <b>Walking and Bicycling Amenities</b>                    |                             |       |         |                   |       |         |
| <b>30&amp;32 Sidewalk condition</b>                       |                             |       |         |                   |       |         |
| 0 No sidewalk                                             | 4,791                       | 2,604 | 7,395   | 61.6              | 88.4  | 72.0    |
| 1 One or two sides in fair/poor condition or under repair | 603                         | 18    | 621     | 7.3               | 0.4   | 4.6     |
| 2 One side in good condition                              | 1,509                       | 377   | 1,886   | 19.4              | 8.5   | 15.2    |
| 3 Both sides in good condition                            | 756                         | 111   | 867     | 11.7              | 2.7   | 8.2     |
| <b>31 Sidewalk buffer</b>                                 |                             |       |         |                   |       |         |
| 0 No sidewalk                                             | 4,791                       | 2,604 | 7,395   | 61.6              | 88.4  | 72.0    |
| 1 Adjacent to street or curb (no buffer)                  | 677                         | 115   | 792     | 9.2               | 2.7   | 6.7     |
| 2 Buffer within 2 feet of street                          | 1,129                       | 217   | 1,346   | 14.2              | 4.3   | 10.4    |
| 3 Buffer more than 2 feet of street                       | 1,063                       | 174   | 1,237   | 15.0              | 4.6   | 11.0    |
| <b>33 Footpath along road</b>                             |                             |       |         |                   |       |         |
| 0 No                                                      | 7,419                       | 3,071 | 10,490  | 96.4              | 98.5  | 97.2    |
| 1 Yes                                                     | 240                         | 38    | 278     | 3.6               | 1.5   | 2.8     |
| <b>34 Any trails that you can see in this segment</b>     |                             |       |         |                   |       |         |
| 0 No                                                      | 7,176                       | 2,829 | 10,005  | 89.9              | 82.6  | 87.0    |
| 1 Yes, only soft surface                                  | 290                         | 234   | 524     | 6.7               | 15.9  | 10.3    |
| 2 Yes, hard surface or both hard and soft surface         | 193                         | 47    | 240     | 3.4               | 1.5   | 2.7     |
| <b>35 Trees shading walking area</b>                      |                             |       |         |                   |       |         |
| 0 No trees along segment                                  | 4,853                       | 2,308 | 7,161   | 61.4              | 70.7  | 65.0    |
| 1 Yes, some trees along segment                           | 2,162                       | 595   | 2,757   | 30.1              | 22.1  | 27.0    |
| 2 Yes, trees along entire segment                         | 645                         | 207   | 852     | 8.5               | 7.1   | 8.0     |
| <b>36 Road oriented public lighting</b>                   |                             |       |         |                   |       |         |
| 0 No                                                      | 2,402                       | 2,197 | 4,599   | 28.8              | 76.9  | 47.4    |
| 1 Yes                                                     | 5,258                       | 912   | 6,170   | 71.2              | 23.1  | 52.6    |
| <b>36 Pedestrian oriented public lighting</b>             |                             |       |         |                   |       |         |
| 0 No                                                      | 6,940                       | 2,718 | 9,658   | 90.5              | 91.6  | 90.9    |
| 1 Yes                                                     | 720                         | 391   | 1,111   | 9.5               | 8.4   | 9.1     |
| <b>Transit and Road Characteristics</b>                   |                             |       |         |                   |       |         |
| <b>37 Bus facilities</b>                                  |                             |       |         |                   |       |         |
| 0 No                                                      | 7,131                       | 3,088 | 10,219  | 91.5              | 99.4  | 94.6    |
| 1 Yes                                                     | 522                         | 19    | 541     | 8.5               | 0.6   | 5.4     |
| <b>38 Number of lanes</b>                                 |                             |       |         |                   |       |         |
| 0 One lane to cross maximum                               | 252                         | 295   | 547     | 2.7               | 9.0   | 5.1     |
| 1 Two lanes to cross maximum                              | 6,571                       | 2,564 | 9,135   | 81.0              | 80.5  | 80.8    |
| 2 Three or more lanes to cross maximum                    | 837                         | 250   | 1,087   | 16.3              | 10.5  | 14.1    |
| <b>39 Road paved</b>                                      |                             |       |         |                   |       |         |
| 0 No                                                      | 456                         | 543   | 999     | 5.7               | 19.1  | 10.9    |
| 1 Yes                                                     | 7,204                       | 2,566 | 9,770   | 94.3              | 80.9  | 89.1    |
| <b>40 Highest speed limit sign on segment</b>             |                             |       |         |                   |       |         |
| 0: ≤ 25 MPH                                               | 1,636                       | 315   | 1,951   | 61.2              | 32.0  | 51.3    |

[Additional File 2] Descriptive statistics for GIS and PIN3 Neighborhood Audit variables for entire sample, overall and by urbanicity (n=10,770)

| Variable*                                                             | Frequency ‡<br>(# segments) |       |         | Weighted percent† |       |         |
|-----------------------------------------------------------------------|-----------------------------|-------|---------|-------------------|-------|---------|
|                                                                       | Urban                       | Rural | Overall | Urban             | Rural | Overall |
| 1: 26 to ≤ 45 MPH                                                     | 717                         | 393   | 1,110   | 34.2              | 57.2  | 42.0    |
| 2: >45 MPH                                                            | 26                          | 34    | 60      | 4.6               | 10.9  | 6.7     |
| <b>41 Shoulder or bike lane</b>                                       |                             |       |         |                   |       |         |
| 0 No                                                                  | 7,232                       | 2,906 | 10,138  | 90.5              | 89.7  | 90.2    |
| 1 Yes                                                                 | 427                         | 203   | 630     | 9.5               | 10.3  | 9.8     |
| <b>42 On-street parking</b>                                           |                             |       |         |                   |       |         |
| 0 No                                                                  | 5,107                       | 2,737 | 7,844   | 66.4              | 90.7  | 75.8    |
| 1 Yes                                                                 | 2,552                       | 372   | 2,924   | 33.6              | 9.3   | 24.2    |
| <b>43_4 Pavement markings, crosswalk</b>                              |                             |       |         |                   |       |         |
| 0 No                                                                  | 7,033                       | 3,055 | 10,088  | 90.9              | 98.6  | 93.8    |
| 1 Yes                                                                 | 606                         | 41    | 647     | 9.1               | 1.4   | 6.2     |
| <b>43_5 Yield to pedestrian paddles, signal, crossing street sign</b> |                             |       |         |                   |       |         |
| 0 No                                                                  | 7,257                       | 3,041 | 10,298  | 93.6              | 97.9  | 95.3    |
| 1 Yes                                                                 | 382                         | 55    | 437     | 6.4               | 2.1   | 4.7     |
| <b>43_8 Bicycle parking facilities</b>                                |                             |       |         |                   |       |         |
| 0 No                                                                  | 7,594                       | 3,093 | 10,687  | 99.1              | 99.9  | 99.4    |
| 1 Yes                                                                 | 45                          | 3     | 48      | 0.9               | 0.1   | 0.6     |
| <b>43_12 Neighborhood entrance sign</b>                               |                             |       |         |                   |       |         |
| 0 No                                                                  | 7,151                       | 2,857 | 10,008  | 91.2              | 92.3  | 91.6    |
| 1 Yes                                                                 | 488                         | 239   | 727     | 8.8               | 7.7   | 8.4     |
| <b>43_13 Neighborhood crime watch</b>                                 |                             |       |         |                   |       |         |
| 0 No                                                                  | 7,037                       | 2,898 | 9,935   | 90.3              | 91.1  | 90.6    |
| 1 Yes                                                                 | 602                         | 198   | 800     | 9.7               | 8.9   | 9.4     |
| <b>43_14 No trespassing sign</b>                                      |                             |       |         |                   |       |         |
| 0 No                                                                  | 6,924                       | 2,630 | 9,554   | 86.7              | 72.1  | 81.0    |
| 1 Yes                                                                 | 715                         | 466   | 1,181   | 13.3              | 27.9  | 19.0    |
| <b>43_15 Beware of dog, invisible fence</b>                           |                             |       |         |                   |       |         |
| 0 No                                                                  | 6,988                       | 2,808 | 9,796   | 89.0              | 85.9  | 87.8    |
| 1 Yes                                                                 | 651                         | 288   | 939     | 11.0              | 14.1  | 12.2    |
| <b>43_16 Billboard</b>                                                |                             |       |         |                   |       |         |
| 0 No                                                                  | 7,568                       | 3,010 | 10,578  | 98.1              | 95.1  | 96.9    |
| 1 Yes                                                                 | 71                          | 86    | 157     | 1.9               | 4.9   | 3.1     |
| <b>43† Control devices oriented for cars</b>                          |                             |       |         |                   |       |         |
| 0 None                                                                | 2,950                       | 1,726 | 4,676   | 33.9              | 54.1  | 41.7    |
| 1 One                                                                 | 4,253                       | 1,224 | 5,477   | 56.0              | 40.4  | 50.0    |
| 2 Two to five                                                         | 436                         | 146   | 582     | 10.1              | 5.5   | 8.3     |
| <b>43€ Signs for cars about bike/pedestrian</b>                       |                             |       |         |                   |       |         |
| 0 No                                                                  | 7,181                       | 2,948 | 10,129  | 91.6              | 92.4  | 91.9    |
| 1 Yes                                                                 | 479                         | 162   | 641     | 8.4               | 7.6   | 8.1     |

\*The item number corresponds to the question number in supplementary file #1.

‡ Weighted by the road segment's length. Sample sizes may not add to 10,770 due to missing values or skips.

§ Non residential segments were left as missing.

# 136 segments could not be determined due to woods or other reasons, so they were set to missing

& 453 segments were coded as "not applicable (private road)" and were set to missing

† Derived as a count for presence of traffic lights, stop signs, speed bumps, median/traffic islands, and curb extensions (#43\_1, 43\_3, 43\_9, 43\_10, and 43\_11).

€ Presence of either a flashing warning sign, "share the road" bicycle sign or other pedestrian or bike friendly traffic signs (#43\_2, 43\_6, and 43\_7).

Item #1, 3, 16, 20, 25, 28, 40, 43\_8, and 43\_16 were not used in the analyses. Item #2 was used to indicate a skip pattern.
